# Supplementary material for: SB939, a Novel Potent and Orally Active Histone Deacetylase Inhibitor with High Tumor Exposure and Efficacy in Mouse Models of Colorectal Cancer
Source: Oxford University Press journal article supplement (doi:10.1158/1535-7163.mct-09-0689), 2010-03-01
Supplement: 15357163mct090689-sup-supp_table_2.xls [file 15357163mct090689-sup-supp_table_2.xls]

## Sheet: Sheet1
	Table S2: Plasma and tissue concentration-time profiles of SB939 after single oral administration of 50 mg/kg SB939 to HCT-116 tumor bearing mice. Values are averages from 3 animals.
	Tissue	Cmax (ng/g or ng/ml)	AUC0-last (ng.h/g or ng.h/ml)	AUC0-¥ (ng.h/g or ng.h/ml)	t1/2
	Liver	4119	1227	1285	2.16
	Lung	5287	1947	1969	1.01
	Kidney	7322	2847	2873	1.13
	Tumor	1309	2500	2953	2.31
	Plasma	5043	1664	1688	1.43
