# Supplementary material for: SB939, a Novel Potent and Orally Active Histone Deacetylase Inhibitor with High Tumor Exposure and Efficacy in Mouse Models of Colorectal Cancer
Source: Oxford University Press journal article supplement (doi:10.1158/1535-7163.mct-09-0689), 2010-03-01
Supplement: 15357163mct090689-sup-supp_table_3.xls [file 15357163mct090689-sup-supp_table_3.xls]

## Sheet: Sheet1
	Table S3: In vitro combination studies with 5-FU in HCT-116 colon cancer cells
	Compound	Combination	Ratio of compounds	CI at ED50 (n=4)	Results of combination
	SB939 and 5-FU	simultaneous	1:15 SB939 : 5-FU	0.56 ± 0.08	synergistic
		SB939 prior to 5-FU	1:15 SB939 : 5-FU	0.79 ± 0.20	synergistic
		5-FU prior to SB939	1:15 5-FU : SB939	0.65 ± 0.15	synergistic
	CI < 0.90: synergistic; CI 0.90 -1.10: additive; CI > 1.10: antagonistic
